# Supplementary material for: Surface modification of magnetic nanoparticles by bacteriophages and ionic liquids precursors
Source: Royal Society of Chemistry journal article supplement (doi:10.1039/d2ra06661k), 2023-01-01
Supplement: d2ra06661k1.pdf [file d2ra06661k1.pdf]

## Surface modification of magnetite nanoparticles by bacteriophages and ionic liquids precursors

Paweł Działak<sup>a\*</sup>, Marcin Daniel Syczewski<sup>bc</sup>, Artur Błachowski<sup>a</sup>, Kamil Kornaus<sup>d</sup>, Tomasz Bajda<sup>a</sup>, Łukasz Zych<sup>d</sup>, Magdalena Osiał<sup>e</sup>, Andrzej Borkowski<sup>a</sup>

<sup>a</sup>Faculty of Geology, Geophysics and Environmental Protection, AGH University of Science and Technology, Al. Mickiewicza 30, 30-059 Krakow, Poland.

\*e-mail: dzialak@agh.edu.pl

<sup>b</sup>Helmholtz Centre Potsdam, GFZ German Research Centre for Geosciences, D-14473 Potsdam, Germany.

<sup>c</sup>Faculty of Geology, University of Warsaw, ul. Żwirki i Wigury 93, 02-089 Warsaw, Poland.

<sup>d</sup>Faculty of Materials Science and Ceramics, AGH University of Science and Technology, Al. Mickiewicza 30, 30-059 Krakow, Poland.

<sup>e</sup>Institute of Fundamental Technological Research, Polish Academy of Sciences, Pawińskiego 5B, 02-106 Warsaw, Poland

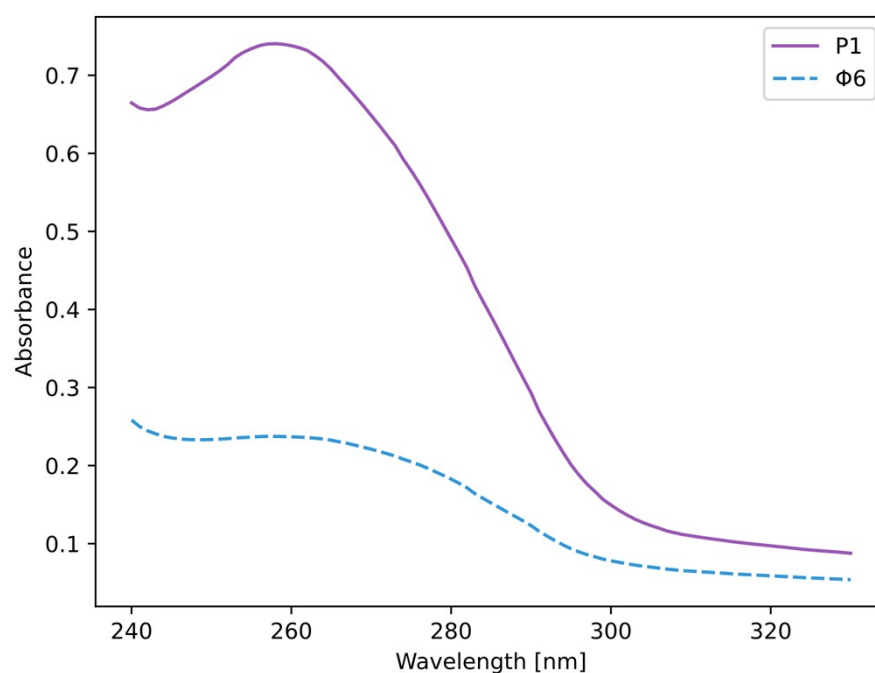

Figure S1. UV-Vis spectra of stock phage suspensions used during experiments.

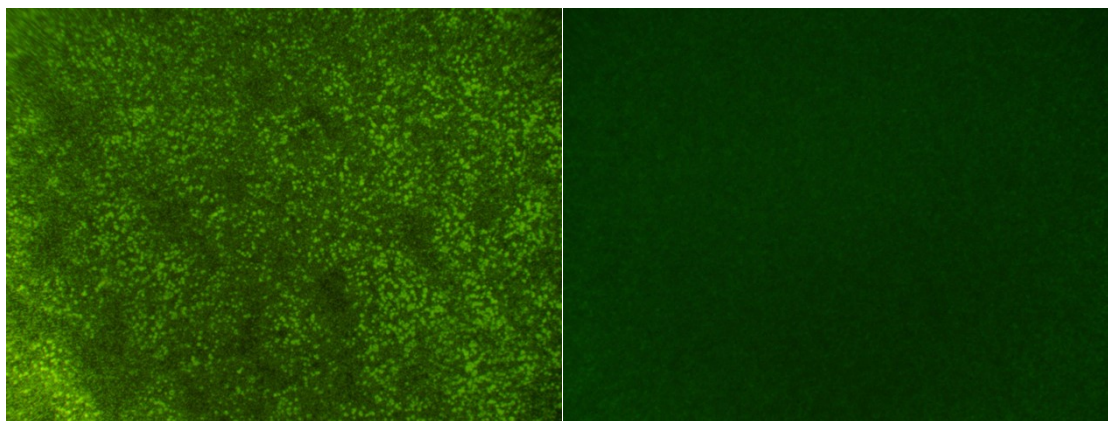

Figure S2. Epifluorescence microscopy images of phage suspensions. SybrGold® stained, *Escherichia* phage P1 (left) and *Pseudomonas* phage Φ6 (right). There are no bacterial debris visible. Both bacteriophages are agglomerated due to the high density of bacteriophages in the suspensions.

Table S1. Unit cell parameters of the studied MNPs based on the XRD measurements.

| Pos. [°2Th.]                            | d-spacing [Å] | Height [cts] | h | k | l | FWHM Left [°2Th.] | Shape Left | Integral Breadth [°2Th.] | Area [cts*°2Th.] | Backgr.[cts] | Crystallite Sizeonly [Å] | Crystallite Sizeonly [nm] | Micro Strain only [%] |
|-----------------------------------------|---------------|--------------|---|---|---|-------------------|------------|--------------------------|------------------|--------------|--------------------------|---------------------------|-----------------------|
| <b>Magnetic NP without modification</b> |               |              |   |   |   |                   |            |                          |                  |              |                          |                           |                       |
| 18.27                                   | 4.85194       | 50(14)       | 1 | 1 | 1 | 1.3097            | 1.119      | 1.914425                 | 96.28            | 225.68       | 48.13765                 | 4.813765                  | 5.039656              |
| 30.1376                                 | 2.96293       | 196(59)      | 0 | 2 | 2 | 1.2588            | 1.131      | 2.760594                 | 540.49           | 124.46       | 34.19281                 | 3.419281                  | 4.332686              |
| 35.5227                                 | 2.52513       | 694(120)     | 1 | 1 | 3 | 1.2324            | 1.137      | 2.065808                 | 1433.52          | 106.71       | 46.76094                 | 4.676094                  | 2.700045              |
| 43.2034                                 | 2.09234       | 153(44)      | 0 | 0 | 4 | 1.1905            | 1.144      | 1.900274                 | 290.44           | 100.15       | 52.24019                 | 5.224019                  | 2.002614              |
| 53.6373                                 | 1.70734       | 69(23)       | 2 | 2 | 4 | 1.1225            | 1.155      | 1.847543                 | 127.63           | 105.81       | 56.07459                 | 5.607459                  | 1.522387              |
| 57.1896                                 | 1.60944       | 172(42)      | 1 | 1 | 5 | 1.0957            | 1.159      | 1.77943                  | 305.96           | 106.54       | 59.29403                 | 5.929403                  | 1.357171              |
| 62.8204                                 | 1.47804       | 321(71)      | 0 | 4 | 4 | 1.0481            | 1.165      | 1.77899                  | 571.88           | 101.73       | 61.06222                 | 6.106222                  | 1.210276              |
| 71.3004                                 | 1.32164       | 28(12)       | 0 | 2 | 6 | 0.9612            | 1.173      | 1.741996                 | 48.2             | 70.77        | 65.66728                 | 6.566728                  | 1.006317              |
| 74.3638                                 | 1.2746        | 67(31)       | 3 | 3 | 5 | 0.9238            | 1.176      | 1.745789                 | 116.29           | 49.74        | 66.87443                 | 6.687443                  | 0.952978              |
| <b>Magnetic NP with P1 phage</b>        |               |              |   |   |   |                   |            |                          |                  |              |                          |                           |                       |
| 18.297                                  | 4.84484       | 48(15)       | 1 | 1 | 1 | 1.3722            | 1.116      | 1.932163                 | 92.86            | 174.55       | 47.31034                 | 4.731034                  | 5.120279              |
| 30.1579                                 | 2.96098       | 188(63)      | 0 | 2 | 2 | 1.3149            | 1.126      | 2.835107                 | 532.66           | 75.33        | 33.27146                 | 3.327146                  | 4.449733              |
| 35.5399                                 | 2.52395       | 668(126)     | 1 | 1 | 3 | 1.2839            | 1.131      | 2.185768                 | 1460.35          | 62.91        | 44.10638                 | 4.410638                  | 2.861208              |
| 43.2159                                 | 2.09176       | 148(48)      | 0 | 0 | 4 | 1.2328            | 1.137      | 2.049588                 | 303.72           | 66.19        | 48.29327                 | 4.829327                  | 2.165685              |
| 53.6431                                 | 1.70717       | 68(24)       | 2 | 2 | 4 | 1.1461            | 1.146      | 1.836166                 | 124.85           | 85.01        | 56.43837                 | 5.643837                  | 1.512423              |
| 57.193                                  | 1.60936       | 171(43)      | 1 | 1 | 5 | 1.1106            | 1.149      | 1.74119                  | 296.97           | 89.09        | 60.81572                 | 6.081572                  | 1.323141              |
| 62.8197                                 | 1.47806       | 324(72)      | 0 | 4 | 4 | 1.0459            | 1.154      | 1.732293                 | 561.45           | 87.37        | 62.78482                 | 6.278482                  | 1.177081              |
| 71.2931                                 | 1.32176       | 29(14)       | 0 | 2 | 6 | 0.9214            | 1.161      | 1.741131                 | 50.6             | 53.86        | 65.69839                 | 6.569839                  | 1.005929              |
| 74.354                                  | 1.27474       | 72(34)       | 3 | 3 | 5 | 0.865             | 1.164      | 1.679986                 | 120.35           | 29.18        | 69.62223                 | 6.962223                  | 0.915469              |
| <b>Magnetic NP with Φ 6 phage</b>       |               |              |   |   |   |                   |            |                          |                  |              |                          |                           |                       |
| 18.2994                                 | 4.8442        | 55(15)       | 1 | 1 | 1 | 1.2784            | 1.116      | 1.803838                 | 99.15            | 205.25       | 50.8182                  | 5.08182                   | 4.766202              |
| 30.1616                                 | 2.96063       | 214(64)      | 0 | 2 | 2 | 1.2294            | 1.126      | 2.676039                 | 572.92           | 99.58        | 35.30613                 | 3.530613                  | 4.192802              |
| 35.5441                                 | 2.52366       | 759(128)     | 1 | 1 | 3 | 1.2046            | 1.131      | 2.035182                 | 1544.03          | 83.43        | 47.49411                 | 4.749411                  | 2.656814              |
| 43.221                                  | 2.09153       | 167(49)      | 0 | 0 | 4 | 1.1656            | 1.138      | 1.905422                 | 318.13           | 81.24        | 52.0965                  | 5.20965                   | 2.007358              |
| 53.6493                                 | 1.70699       | 75(25)       | 2 | 2 | 4 | 1.1038            | 1.147      | 1.754699                 | 131.96           | 93.58        | 59.17793                 | 5.917793                  | 1.442251              |
| 57.1997                                 | 1.60918       | 187(45)      | 1 | 1 | 5 | 1.0798            | 1.15       | 1.72266                  | 321.88           | 95.99        | 61.34118                 | 6.134118                  | 1.311666              |
| 62.8272                                 | 1.4779        | 348(74)      | 0 | 4 | 4 | 1.0378            | 1.155      | 1.716545                 | 597.18           | 92.48        | 63.39055                 | 6.339055                  | 1.165709              |
| 71.3017                                 | 1.32162       | 30(13)       | 0 | 2 | 6 | 0.9626            | 1.162      | 1.764656                 | 52.28            | 58.83        | 64.78459                 | 6.478459                  | 1.020011              |
| 74.3631                                 | 1.27461       | 71(35)       | 3 | 3 | 5 | 0.9308            | 1.165      | 1.784553                 | 126.52           | 35.02        | 65.35214                 | 6.535214                  | 0.975184              |

Table S2. Electrokinetic potential measurements. Scheffé test; \*\*\*\* indicates belonging to a homogeneous group. Dunnett's test; red marked p-values indicate statistical differences (at  $p < 0.05$ ).

| <i>Scheffé</i>   | 1    | 2    | 3    | 4    | 5    | 6    | 7    | 8    | 9    | 10   | <i>Dunnett</i>   | NP    | NP/P1 | NP/ $\Phi$ 6 |
|------------------|------|------|------|------|------|------|------|------|------|------|------------------|-------|-------|--------------|
| NP               | **** | **** |      |      |      |      |      |      |      |      | NP               | -     | 0.000 | 1.000        |
| NP/P1            |      |      |      | **** | **** | **** |      |      |      |      | NP/P1            | 0.000 | -     | 0.000        |
| NP/ $\Phi$ 6     | **** | **** |      |      |      |      |      |      |      |      | NP/ $\Phi$ 6     | 0.898 | 0.000 | -            |
| NP/OH            |      | **** | **** | **** |      |      |      |      |      |      | NP/OH            | 0.000 | 0.001 | 0.000        |
| NP/OH/P1         | **** | **** | **** |      |      |      |      |      |      |      | NP/OH/P1         | 0.004 | 0.000 | 0.021        |
| NP/OH/ $\Phi$ 6  |      |      |      |      | **** | **** | **** | **** |      |      | NP/OH/ $\Phi$ 6  | 0.000 | 0.363 | 0.000        |
| NP/C8            |      |      |      |      | **** | **** | **** | **** | **** |      | NP/C8            | 0.000 | 0.006 | 0.000        |
| NP/C8/P1         |      |      |      |      |      |      |      | **** | **** | **** | NP/C8/P1         | 0.000 | 0.000 | 0.000        |
| NP/C8/ $\Phi$ 6  |      |      |      |      |      |      | **** | **** | **** | **** | NP/C8/ $\Phi$ 6  | 0.000 | 0.000 | 0.000        |
| NP/C10           |      |      |      | **** | **** | **** | **** |      |      |      | NP/C10           | 0.000 | 0.997 | 0.000        |
| NP/C10/P1        |      |      |      | **** | **** | **** | **** | **** |      |      | NP/C10/P1        | 0.000 | 0.722 | 0.000        |
| NP/C10/ $\Phi$ 6 | **** | **** | **** |      |      |      |      |      |      |      | NP/C10/ $\Phi$ 6 | 0.008 | 0.000 | 0.039        |
| NP/C12           |      |      |      |      |      |      |      |      | **** | **** | NP/C12           | 0.000 | 0.000 | 0.000        |
| NP/C12/P1        |      |      |      | **** | **** | **** | **** |      |      |      | NP/C12/P1        | 0.000 | 0.933 | 0.000        |
| NP/C12/ $\Phi$ 6 |      |      |      |      |      | **** | **** | **** | **** |      | NP/C12/ $\Phi$ 6 | 0.000 | 0.000 | 0.000        |
| NP/C14           |      |      |      |      |      |      | **** | **** | **** | **** | NP/C14           | 0.000 | 0.000 | 0.000        |
| NP/C14/P1        | **** |      |      |      |      |      |      |      |      |      | NP/C14/P1        | 1.000 | 0.000 | 0.518        |
| NP/C14/ $\Phi$ 6 |      |      |      |      |      |      | **** | **** | **** | **** | NP/C14/ $\Phi$ 6 | 0.000 | 0.000 | 0.000        |
| NP/C16           |      |      |      |      | **** | **** | **** | **** | **** |      | NP/C16           | 0.000 | 0.007 | 0.000        |
| NP/C16/P1        |      |      | **** | **** | **** |      |      |      |      |      | NP/C16/P1        | 0.000 | 0.680 | 0.000        |
| NP/C16/ $\Phi$ 6 |      |      | **** | **** | **** |      |      |      |      |      | NP/C16/ $\Phi$ 6 | 0.000 | 0.630 | 0.000        |
| NP/C18           |      |      |      |      |      |      |      |      |      | **** | NP/C18           | 0.000 | 0.000 | 0.000        |
| NP/C18/P1        |      |      |      |      | **** | **** | **** | **** | **** |      | NP/C18/P1        | 0.000 | 0.010 | 0.000        |
| NP/C18/ $\Phi$ 6 |      |      |      |      |      | **** | **** | **** | **** |      | NP/C18/ $\Phi$ 6 | 0.000 | 0.000 | 0.000        |

Table S3. Loss of viability of *E. coli*. Scheffé test; \*\*\*\* indicates belonging to a homogeneous group.

| Free living      |      |      |      | On surface       |      |      |      |      |
|------------------|------|------|------|------------------|------|------|------|------|
| Scheffé          | 1    | 2    | 3    | Scheffé          | 1    | 2    | 3    | 4    |
| Control          | **** |      |      |                  |      |      |      |      |
| NP               | **** |      |      | NP               | **** |      |      |      |
| NP/P1            | **** |      |      | NP/P1            | **** | **** |      |      |
| NP/ $\phi$ 6     | **** |      |      | NP/ $\phi$ 6     | **** |      |      |      |
| NP/OH            | **** |      |      | NP/OH            | **** |      |      |      |
| NP/P1/OH         | **** |      |      | NP/P1/OH         | **** |      |      |      |
| NP/ $\phi$ 6/OH  | **** |      |      | NP/ $\phi$ 6/OH  | **** |      |      |      |
| NP/C8            | **** |      |      | NP/C8            | **** |      |      |      |
| NP/P1/C8         | **** |      |      | NP/P1/C8         | **** |      |      |      |
| NP/ $\phi$ 6/C8  | **** |      |      | NP/ $\phi$ 6/C8  | **** |      |      |      |
| NP/C10           | **** |      |      | NP/C10           | **** |      |      |      |
| NP/P1/C10        | **** |      |      | NP/P1/C10        | **** |      |      |      |
| NP/ $\phi$ 6/C10 | **** |      |      | NP/ $\phi$ 6/C10 | **** |      |      |      |
| NP/C12           | **** |      |      | NP/C12           | **** |      |      |      |
| NP/P1/C12        | **** |      |      | NP/P1/C12        | **** |      |      |      |
| NP/ $\phi$ 6/C12 | **** |      |      | NP/ $\phi$ 6/C12 | **** |      |      |      |
| NP/C14           | **** |      |      | NP/C14           | **** |      |      |      |
| NP/P1/C14        | **** |      |      | NP/P1/C14        | **** |      |      |      |
| NP/ $\phi$ 6/C14 | **** |      |      | NP/ $\phi$ 6/C14 |      | **** |      |      |
| NP/C16           | **** |      |      | NP/C16           | **** |      |      |      |
| NP/P1/C16        |      | **** |      | NP/P1/C16        |      |      |      | **** |
| NP/ $\phi$ 6/C16 |      | **** |      | NP/ $\phi$ 6/C16 |      |      |      | **** |
| NP/C18           |      | **** |      | NP/C18           |      |      | **** |      |
| NP/P1/C18        |      |      | **** | NP/P1/C18        |      |      | **** |      |
| NP/ $\phi$ 6/C18 |      |      | **** | NP/ $\phi$ 6/C18 |      |      |      | **** |

Table S4. Loss of viability of *B. cereus*. Scheffé test; \*\*\*\* indicates belonging to a homogeneous group.

| Free living      |      |      |      |      |      | On surface       |      |      |      |      |      |
|------------------|------|------|------|------|------|------------------|------|------|------|------|------|
| Scheffé          | 1    | 2    | 3    | 4    | 5    | Scheffé          | 1    | 2    | 3    | 4    | 5    |
| Control          | **** |      |      |      |      |                  |      |      |      |      |      |
| NP               | **** |      |      |      |      | NP               | **** |      |      |      |      |
| NP/P1            | **** |      |      |      |      | NP/P1            | **** | **** |      |      |      |
| NP/ $\phi$ 6     | **** |      |      |      |      | NP/ $\phi$ 6     | **** | **** |      |      |      |
| NP/OH            | **** |      |      |      |      | NP/OH            | **** | **** |      |      |      |
| NP/P1/OH         | **** | **** |      |      |      | NP/P1/OH         | **** | **** |      |      |      |
| NP/ $\phi$ 6/OH  | **** | **** |      |      |      | NP/ $\phi$ 6/OH  | **** | **** |      |      |      |
| NP/C8            | **** |      |      |      |      | NP/C8            | **** | **** |      |      |      |
| NP/P1/C8         | **** | **** |      |      |      | NP/P1/C8         | **** | **** |      |      |      |
| NP/ $\phi$ 6/C8  | **** | **** | **** |      |      | NP/ $\phi$ 6/C8  | **** | **** |      |      |      |
| NP/C10           | **** | **** |      |      |      | NP/C10           | **** | **** |      |      |      |
| NP/P1/C10        | **** | **** |      |      |      | NP/P1/C10        | **** | **** |      |      |      |
| NP/ $\phi$ 6/C10 | **** | **** | **** |      |      | NP/ $\phi$ 6/C10 | **** | **** |      |      |      |
| NP/C12           | **** | **** |      |      |      | NP/C12           | **** | **** |      |      |      |
| NP/P1/C12        | **** | **** |      |      |      | NP/P1/C12        | **** | **** |      |      |      |
| NP/ $\phi$ 6/C12 | **** | **** |      |      |      | NP/ $\phi$ 6/C12 | **** | **** |      |      |      |
| NP/C14           | **** | **** |      |      |      | NP/C14           | **** | **** |      |      |      |
| NP/P1/C14        | **** |      |      |      |      | NP/P1/C14        | **** | **** |      |      |      |
| NP/ $\phi$ 6/C14 | **** | **** | **** |      |      | NP/ $\phi$ 6/C14 |      | **** |      |      |      |
| NP/C16           |      | **** | **** | **** |      | NP/C16           |      |      | **** | **** | **** |
| NP/P1/C16        |      |      | **** | **** |      | NP/P1/C16        |      |      | **** | **** |      |
| NP/ $\phi$ 6/C16 |      |      |      | **** |      | NP/ $\phi$ 6/C16 |      |      | **** | **** | **** |
| NP/C18           |      |      |      | **** |      | NP/C18           |      |      | **** |      |      |
| NP/P1/C18        |      |      |      |      | **** | NP/P1/C18        |      |      |      | **** | **** |
| NP/ $\phi$ 6/C18 |      |      |      |      | **** | NP/ $\phi$ 6/C18 |      |      |      |      | **** |
